# Supplementary material
Source: MDPI journal article supplement (https://www.mdpi.com/2071-1050/15/6/5598)
Supplement: s1 [file s1]

## Questionnaire to explore the potential of a levy on allotment garden products

### Question 1: For what purpose do you primarily use your garden?

Recreation ☐

Cultivation of fruits and vegetables ☐

Cultivation of flowers ☐

Recreation and self-supply equally ☐

For other purpose ☐ namely: \_\_\_\_\_

### Question 2: In general, how much are you interested in the production of food?

*On a scale of 1-10, where 1 stands for "not at all" and 10 for "very much".*

1 ☐ 2 ☐ 3 ☐ 4 ☐ 5 ☐ 6 ☐ 7 ☐ 8 ☐ 9 ☐ 10 ☐

### Question 3: How much do you know about cultivating fruits and vegetables in general?

*On a scale of 1-10, where 1 stands for "not at all" and 10 for "very much".*

1 ☐ 2 ☐ 3 ☐ 4 ☐ 5 ☐ 6 ☐ 7 ☐ 8 ☐ 9 ☐ 10 ☐

### Question 4: Which fruits/vegetable/flower species do you harvest the most? Please name the most represented species/varieties. If you "harvest" honey, you can also indicate this.

---

---

---

**Question 5: What percentage of the food demand of the people living in your household do you cover with the produce from your garden?**

\_\_\_\_\_ %

**Question 6: On a scale of 1 - 10, how often do you harvest more than you consume?**

*Where 1 stands for "never" and 10 for "very often".*

1 ☐ 2 ☐ 3 ☐ 4 ☐ 5 ☐ 6 ☐ 7 ☐ 8 ☐ 9 ☐ 10 ☐

**Question 7: Approximately what percentage of the total harvest is the surplus that you do not consume yourself?**

\_\_\_\_\_ %

**Question 8: Of which fruits and vegetables or other products from your garden do you have a surplus?**

\_\_\_\_\_  
\_\_\_\_\_

**Question 9: What happens to the surplus of fruits and vegetables?**

*Multiple responses possible*

I give it as a gift  
I swap it

☐  
☐

I process it further (preserve)  
I throw it to the compost

☐  
☐

Something else, namely: \_\_\_\_\_

☐

**Question 10: When you exchange products from your garden with other gardeners - how many times a year does that happen?**

\_\_\_\_\_ times a year fruits and vegetables

\_\_\_\_\_ times a year seeds, young plants, cut flowers or honey

**Question 11: When you give away products from your garden - how often does that happen?**

\_\_\_\_\_ times a year fruits and vegetables

\_\_\_\_\_ times a year seeds, young plants, cut flowers or honey

**Question 12: Have you ever thought about whether it would be possible to sell products that you have grown/harvested yourself?**

Yes ☐ No ☐

**The Federal Allotment Garden Law prohibits „commercial activities“ in allotment gardens.**

**Question 13: Did you know this regulation?**

Yes ☐ No ☐

**Question 14: Do you think this regulation makes sense in the frame of a sale on local level/small-scale? Regardless of whether there is a surplus or not.**

- ☐ I think the regulation also makes sense in this context
- ☐ I think the scheme makes sense but there should be a way to sell surplus
- ☐ I do not think that the regulation is useful in this context

**Question 15.1: If selling garden products would be allowed – would you generally find a system useful that organizes the distribution of surplus to potential consumers? Similar to a stand in the countryside in front of a farm where products from the own cultivation are sold.**

Yes ☐ Maybe ☐ No ☐

**Question 15.2: Why?**

---

---

---

---

**Question 16: Even if you could only earn a small amount of money, would it still be attractive for you personally to sell products from your garden?**

Yes ☐ Maybe ☐ No ☐

Questionnaire of the publication Schaefer et al. "Allotment garden products as contribution to sustainable and resilient cities: An Analysis in Leipzig, Germany". Translated from German.

**Question 17: If no, under which circumstances would you be more willing to give away some products?**

*For example, as a gift or for how much earnings or for what purpose?*

---

---

---

**Question 18: Have you ever sold products from you garden despite this regulation? For example via „[www.direkt-vom-beet.de](http://www.direkt-vom-beet.de)", similar Websites, oder „Ebay Kleinanzeigen“?**

No ☐ Yes, via: \_\_\_\_\_ ☐

**Question 19: Would you be willing to give surplus produce to a gastronomy facility related to your allotment garden association?**

*Please tick only one answer*

- ☐ Yes, if I had surplus, I would also give it away to such a gastronomy facility  
☐ Yes, if I had surplus, I would sell it to such a gastronomy facility  
☐ No

**Question 20: Do you use plant protection products and/or pesticides?**

*Multiple answers possible*

*Biological here means free of chemical substances, instead purely plant/animal products, e.g. slug repellent made from lavender.*

Yes, chemical ☐ Yes, biological ☐ No ☐

**Question 21: Do you use fertilizers?**

*Multiple answers possible*

*Biological here means free of chemical substances, instead purely plant/animal products, such as horn shavings*

Yes, chemical ☐ Yes, biological ☐ No ☐

Questionnaire of the publication Schaefer et al. "Allotment garden products as contribution to sustainable and resilient cities: An Analysis in Leipzig, Germany". Translated from German.

**And hereafter a few questions about yourself.**

**Question 22: How old are you?**

\_\_\_\_\_ Years

**Question 23: Which gender do you feel you belong to?**

Female ☐ Male ☐ Divers ☐

**Question 24: Which type of employment are you currently in?**

Employed ☐ Without Work ☐ Self-Employed / Freelance ☐

**Question 25: How many people make up your household?**

*Note: In the financial sense - A shared apartment does not count as a household here*

\_\_\_\_\_ Persons

**Question 26: What is your monthly household income?**

*(Net, i.e. remuneration for work, pensions, unemployment benefit, income from self-employment, child benefit, income from property, income from renting and leasing, after government inflows and outflows of all household members added together).*

*Note: The entire questionnaire and your answers are anonymous*

< 1000 € ☐ 1000-2000 € ☐ 2000-3000 € ☐  
3000-4000 € ☐ 4000-5000 € ☐ > 5000 € ☐

**Question 27: Do you live in the same district, where your allotment garden is located?**

Yes ☐ No ☐

---

**Thank you for  
your  
participation!**
